# Supplementary material
Source: Springer Nature journal article supplement (https://www.springermedizin.de/resource/supplementary/12990_2010_365_MOESM5_ESM.pdf/9613276)

**Vehicle**

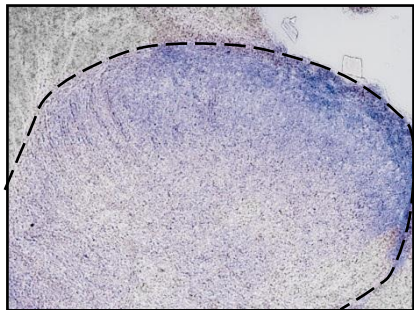

**Oxaliplatin**

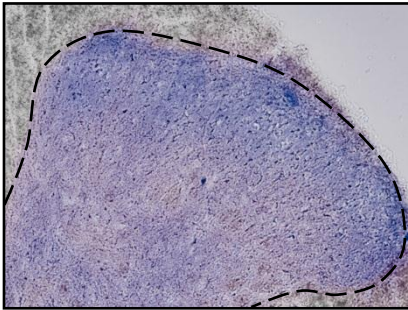

**Oxaliplatin  
+ Ro 25-6981**

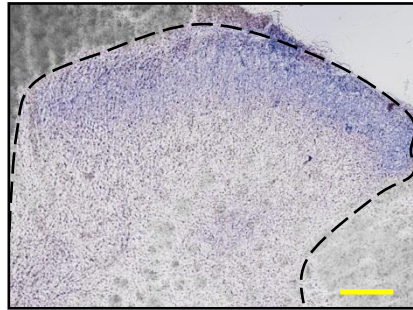

Supplement: MOESM5 [file 9613276]
